# Supplementary material for: Enhanced gas-sensing performance of metal@ZnO core–shell nanoparticles towards ppb–ppm level benzene: the role of metal–ZnO hetero-interfaces
Source: Royal Society of Chemistry journal article supplement (doi:10.1039/c8nj04621b), 2018-12-21
Supplement: c8nj04621b1.pdf [file c8nj04621b1.pdf]

## Supplementary Information

# Enhanced Gas-sensing Performance of Metal@ZnO Core-shell Nanoparticles towards ppb~ppm Level Benzene: the Role of Metal-ZnO Hetero-Interface

Yan Gong<sup>a,b</sup>, Xiaofeng Wu<sup>a,\*</sup>, Jiayuan Chen<sup>a,b</sup>, Wenhui Li<sup>a,b</sup>, Ning Han<sup>a</sup>, Donghai Zhang<sup>a</sup>, Yunfa Chen<sup>a,\*</sup>

<sup>a</sup> State Key Laboratory of Multi-phase Complex Systems, Institute of Process Engineering, Chinese Academy of Sciences, Beijing 100190, China

<sup>b</sup> University of Chinese Academy of Sciences, No. 19 A Yuquan Road, Beijing 100049, China.

Corresponding author: [wxfstjc@ipe.ac.cn](mailto:wxfstjc@ipe.ac.cn) or [chenyf@ipe.ac.cn](mailto:chenyf@ipe.ac.cn).

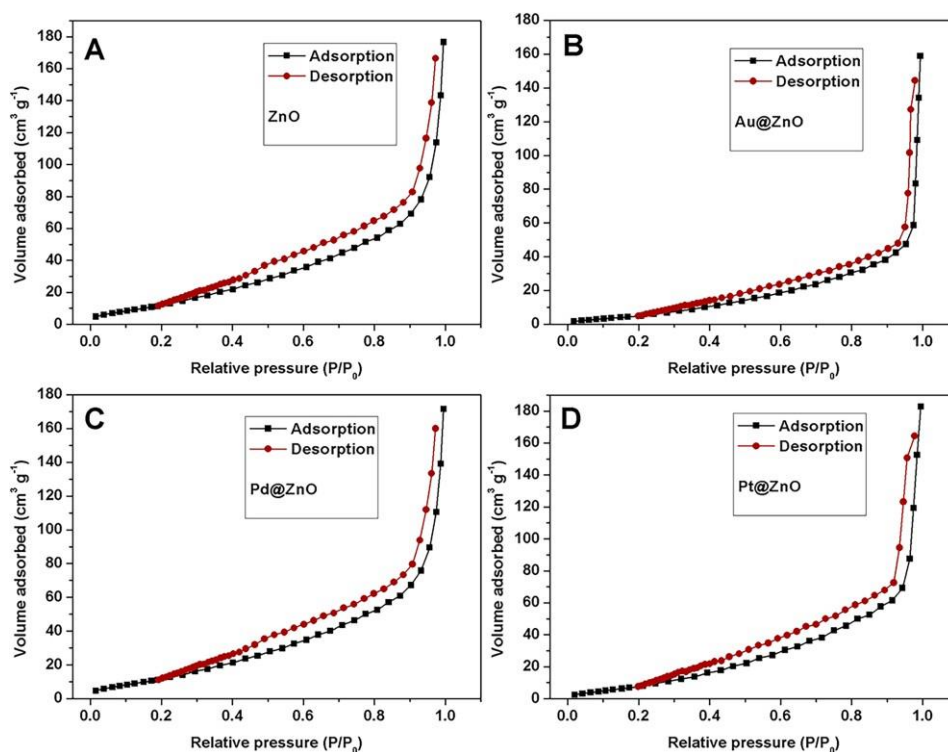

Fig. S1 N<sub>2</sub> adsorption–desorption isotherms curve of the ZnO (A), Au@ZnO (B), Pd@ZnO (C) and Pt@ZnO (d) nanoparticles.
